# Supplementary material
Source: Springer Nature journal article supplement (https://www.springerprofessional.de/resource/supplementary/13638_2010_16_MOESM5_ESM.pdf/11897190)

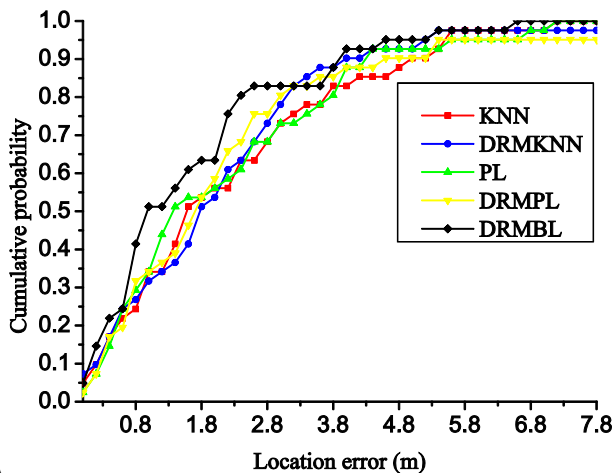

**A**

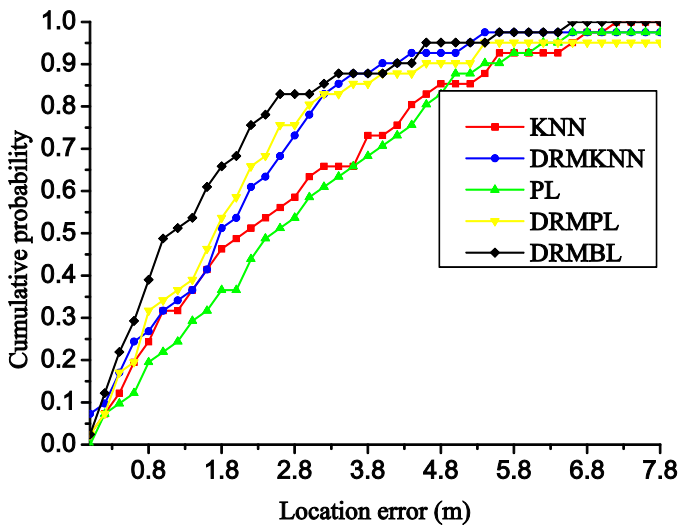

**B**

Supplement: MOESM5 [file 11897190]
